# Supplementary material
Source: PubMed Central journal article supplement (PMC4854673)
Supplement: supp_pp.15.01335_PP2015-01335R2_Supplemental_Figure_S1.pdf [file supp_pp.15.01335_PP2015-01335R2_Supplemental_Figure_S1.pdf]

1 Supplemental Figure 1

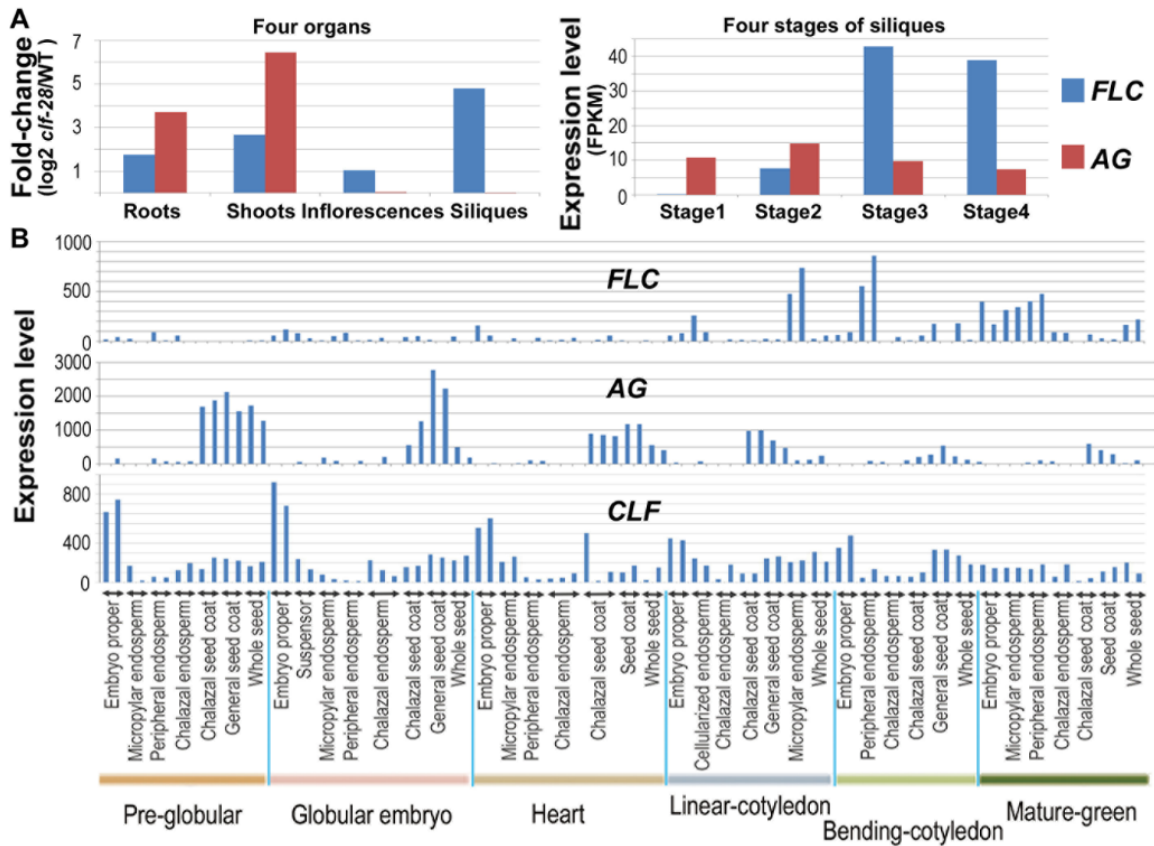

2

3 Supplemental Figure 1. Expression specificities of *FLC*, *AG* and *CLF* in embryos

4 (A) Expression specificities of *FLC* and *AG* in 4 different organs and at 4 developmental  
 5 stages of siliques detected by RNA-seq. (B) Expression levels of *FLC*, *AG* and *CLF*  
 6 measured by normalized microarray signal intensities of various embryo samples. X-axis  
 7 gives the name of samples obtained by micro-dissection. Each set of biological replicates  
 8 was shown by a two-way arrow. Developmental stages were marked by different colors  
 9 on the bottom of the figure.

10

11

12

13
