# Supplementary material
Source: PubMed Central journal article supplement (PMC4854673)
Supplement: supp_pp.15.01335_PP2015-01335R2_Supplemental_Figure_S2.pdf [file supp_pp.15.01335_PP2015-01335R2_Supplemental_Figure_S2.pdf]

1 **Supplemental Figure 2**

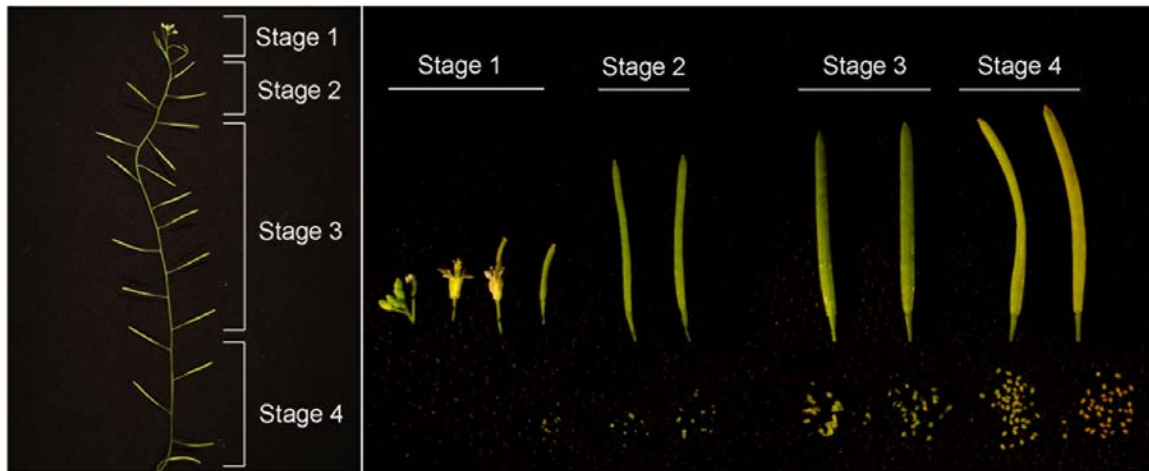

2

3 **Supplemental Figure 2. Siliques at 4 different developmental stages used for RNA-**  
4 **seq experiments**

5 Embryos derived from siliques at each stage were used.

6

7

8
