# Supplementary material
Source: PubMed Central journal article supplement (PMC4854673)
Supplement: supp_pp.15.01335_PP2015-01335R2_Supplemental_Figure_S3.pdf [file supp_pp.15.01335_PP2015-01335R2_Supplemental_Figure_S3.pdf]

1 Supplemental Figure 3

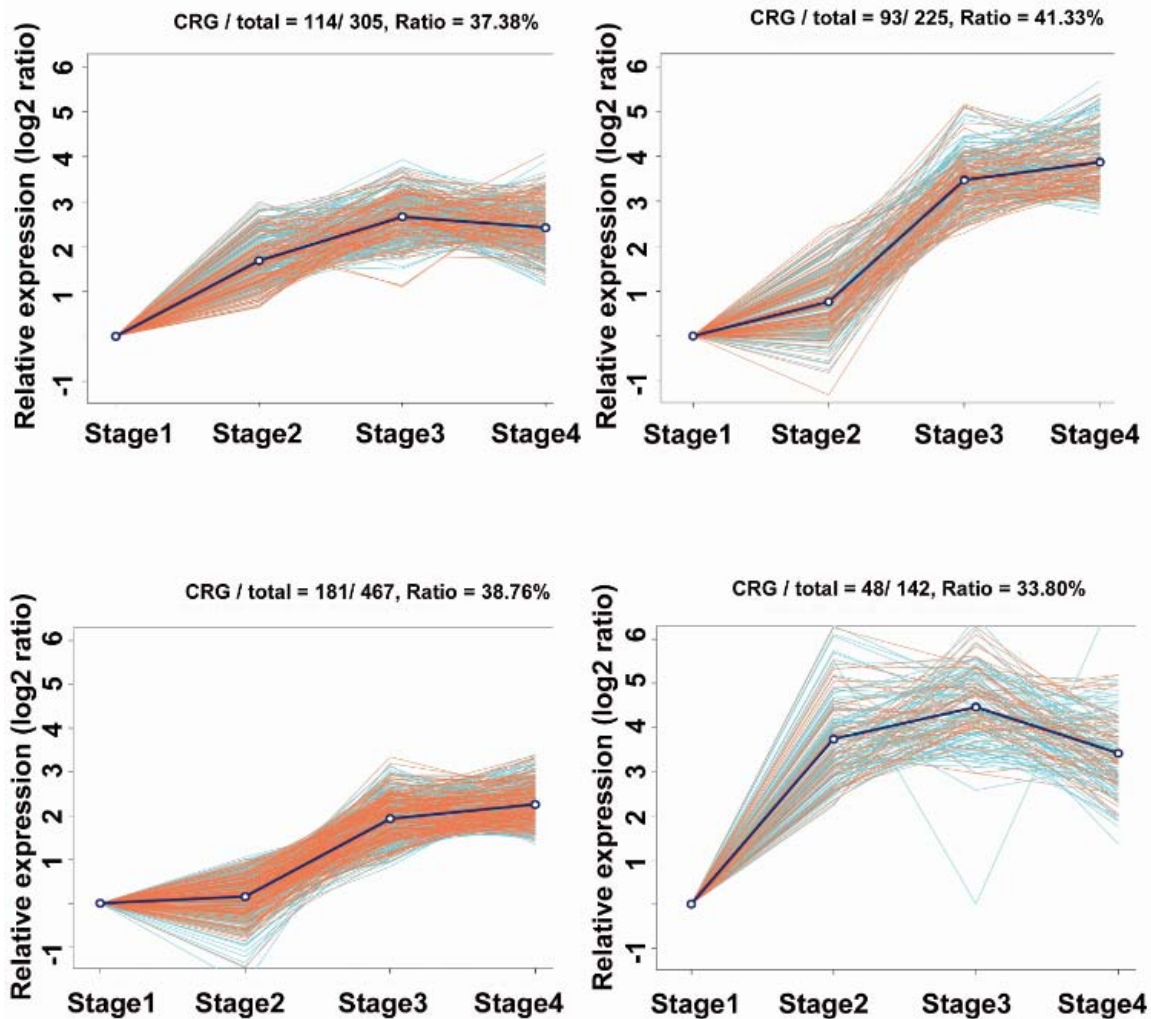

2

3 Supplemental Figure 3. Gene clusters with enriched CRGs are preferentially  
4 expressed at the mature-green stage

5 The ratio between CRG number and total gene number in a cluster is given. Expression  
6 levels (normalized FPKMs) of genes at stage-1 were used as the reference to calculate  
7 relative expression levels. Red and cyan lines show CRG and other genes, respectively.  
8 Blue line gives mean values of relative expression levels.

9

10
