# Supplementary material
Source: PubMed Central journal article supplement (PMC4854673)
Supplement: supp_pp.15.01335_PP2015-01335R2_Supplemental_Figure_S5.pdf [file supp_pp.15.01335_PP2015-01335R2_Supplemental_Figure_S5.pdf]

1 Supplemental Figure 5

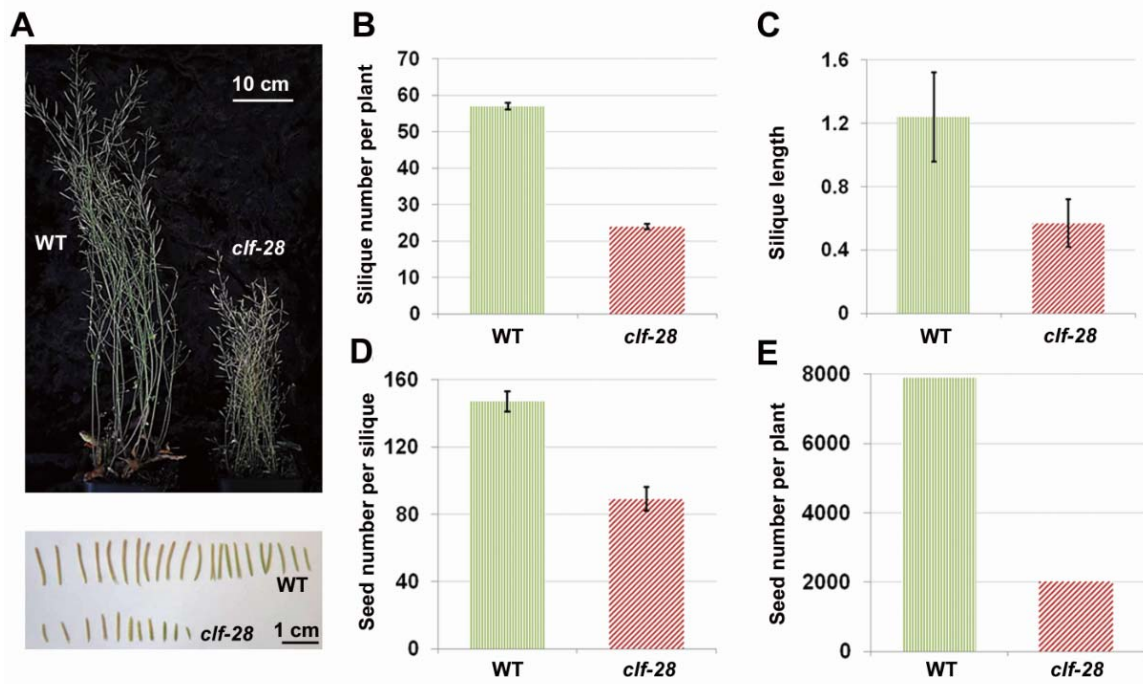

2

3 Supplemental Figure 5. Developmental defects in vegetative and reproductive  
4 organs of *clf-28*

5 Biomass (A), length and number of siliques (A-C) and seed number (D and E) of *clf-28*  
6 and WT plants. Error bars represents standard deviation.

7

8
