# Supplementary material
Source: PubMed Central journal article supplement (PMC4854673)
Supplement: supp_pp.15.01335_PP2015-01335R2_Supplemental_Figure_S6.pdf [file supp_pp.15.01335_PP2015-01335R2_Supplemental_Figure_S6.pdf]

1 Supplemental Figure 6

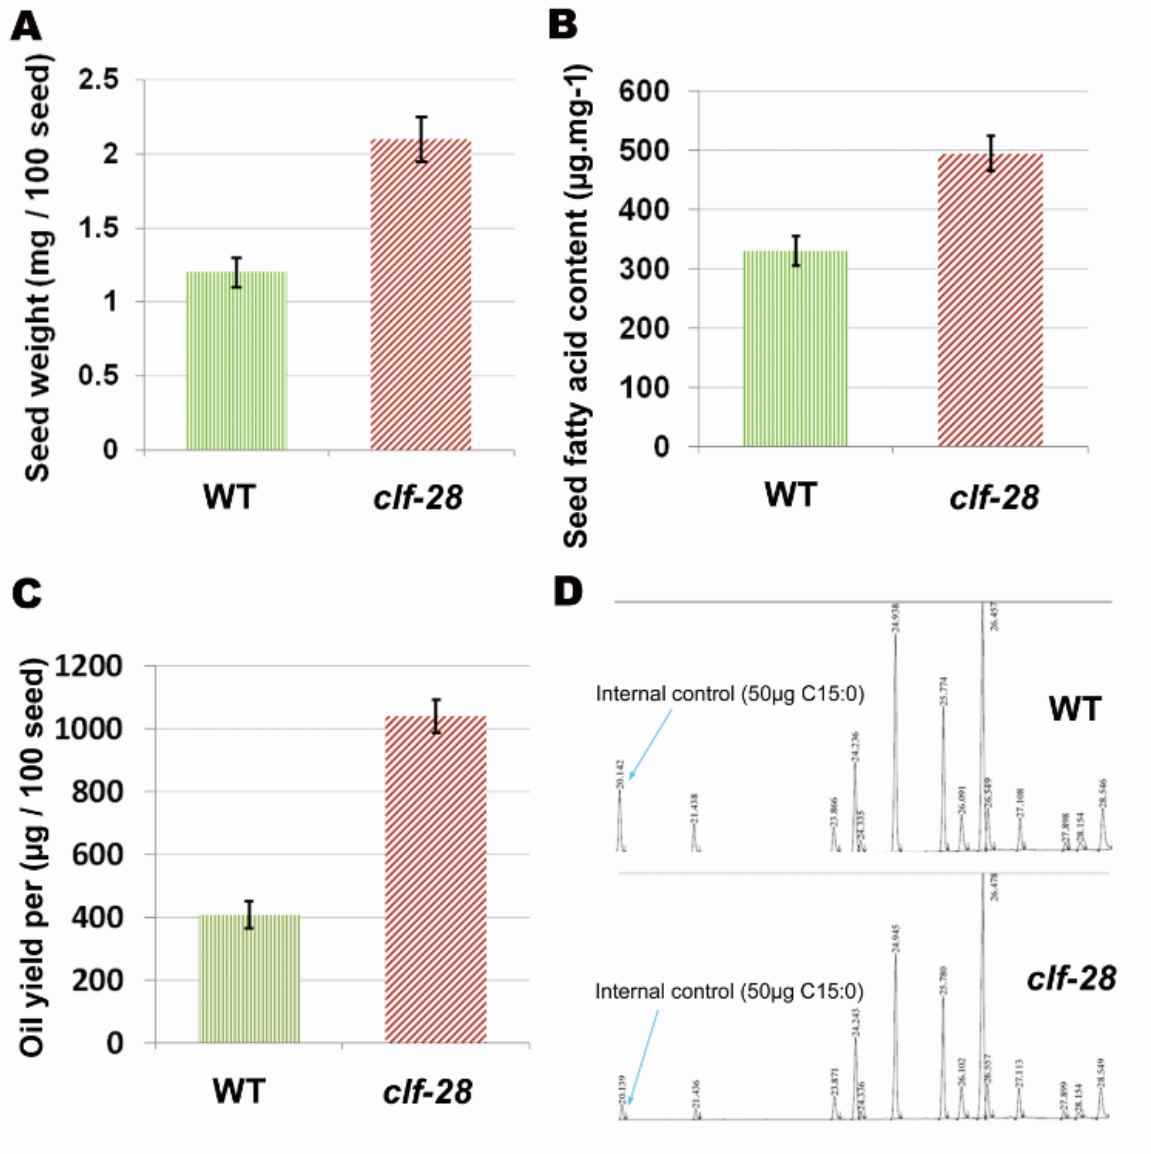

2

3 Supplemental Figure 6. Seed weight and fatty acid content in WT and *clf-28* seeds

4 Seed weight (A) and oil content (B and C) of *clf-28* and WT. (D) Fatty acid composition  
5 of dry seeds profiled by gas chromatography.

6

7
