# Supplementary material
Source: PubMed Central journal article supplement (PMC4854673)
Supplement: supp_pp.15.01335_PP2015-01335R2_Supplemental_Figure_S7.pdf [file supp_pp.15.01335_PP2015-01335R2_Supplemental_Figure_S7.pdf]

1 **Supplemental Figure 7**

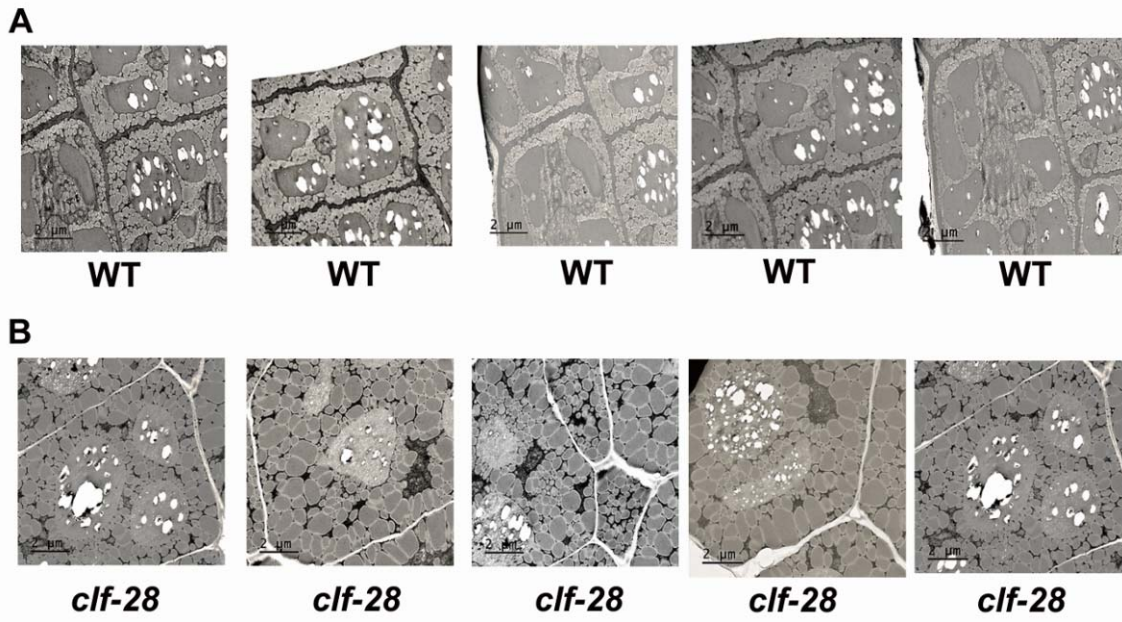

2

3 **Supplemental Figure 7. Oil bodies in WT and *clf-28* seeds**

4 Panels show paraffin section (10μm×10μm area) of WT and *clf-28* seed cells.

5

6
