# Supplementary material
Source: PubMed Central journal article supplement (PMC4854673)
Supplement: supp_pp.15.01335_PP2015-01335R2_Supplemental_Figure_S10.pdf [file supp_pp.15.01335_PP2015-01335R2_Supplemental_Figure_S10.pdf]

1 Supplemental Figure 10

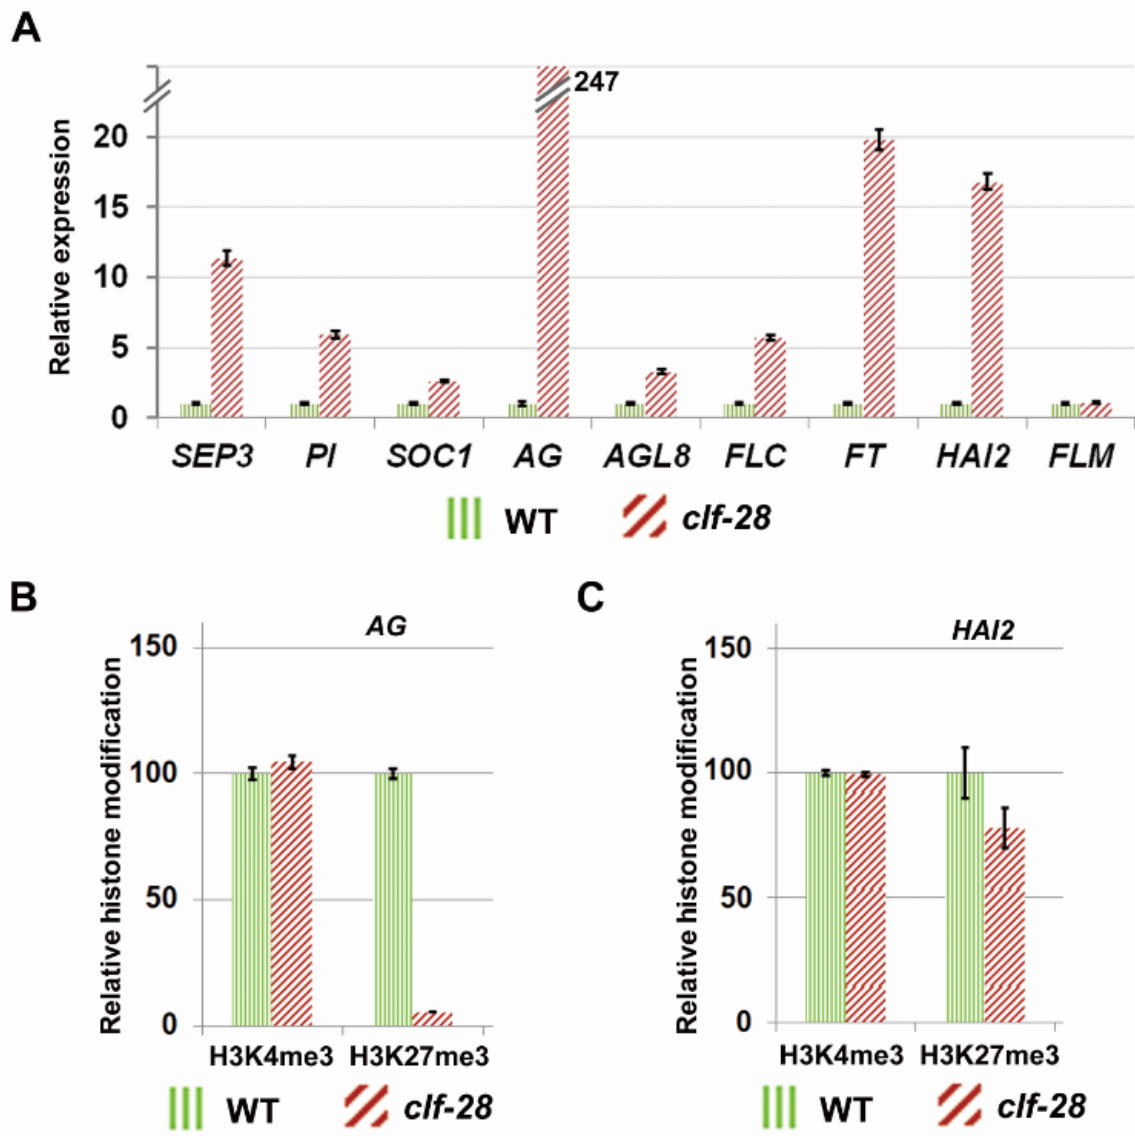

2

3 Supplemental Figure 10. Experimental verification of pCTGs by qRT-PCR and  
4 ChIP

5 (A) Expression levels of the reported CLF-regulated genes in *clf-28* and WT seedlings  
6 detected by qRT-PCR. FLM served as a negative control of CLF regulation. Error bar  
7 represents standard error (n=3). (B) Histone modification levels on *AG* and *HAI2* in  
8 seedlings determined by ChIP-PCR. Error bar represents standard error (n=3).

9

10
