# Supplementary material
Source: PubMed Central journal article supplement (PMC4854673)
Supplement: supp_pp.15.01335_PP2015-01335R2_Supplemental_Figure_S11.pdf [file supp_pp.15.01335_PP2015-01335R2_Supplemental_Figure_S11.pdf]

1 **Supplemental Figure 11**

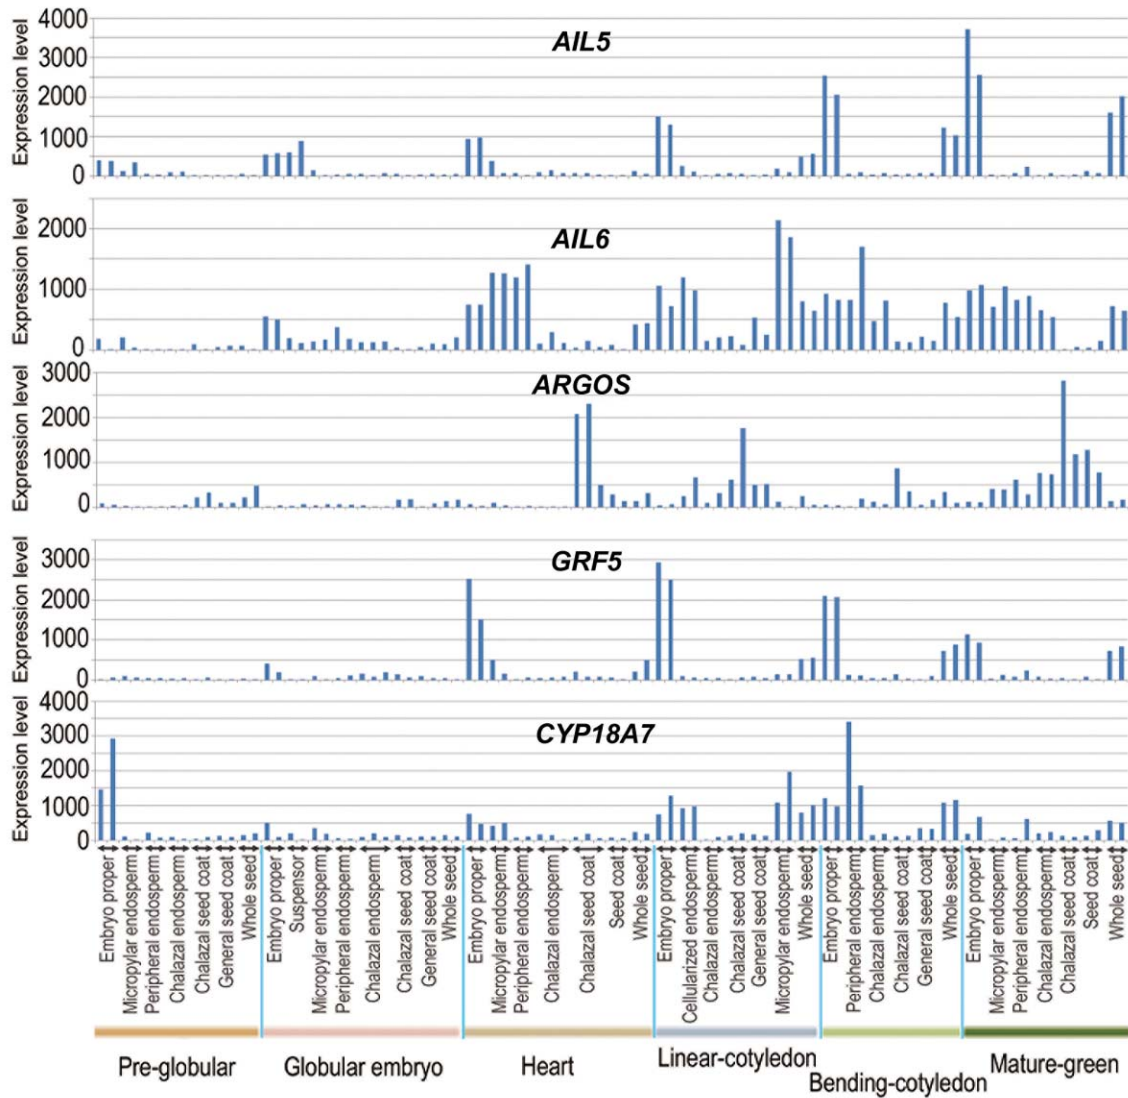

2

3 **Supplemental Figure 11. Expression specificities of the genes controlling cell size in**  
 4 **embryos**

5 Expression levels were measured by normalized microarray signal intensities. X-axis  
 6 gives the name of samples obtained by micro-dissection. Each set of biological replicates  
 7 was shown by a two-way arrow. Developmental stages were marked by different colors  
 8 on the bottom of the figure.

9

10
