# Supplementary material
Source: PubMed Central journal article supplement (PMC4854673)
Supplement: supp_pp.15.01335_PP2015-01335R2_Supplemental_Figure_S12.pdf [file supp_pp.15.01335_PP2015-01335R2_Supplemental_Figure_S12.pdf]

1 Supplemental Figure 12

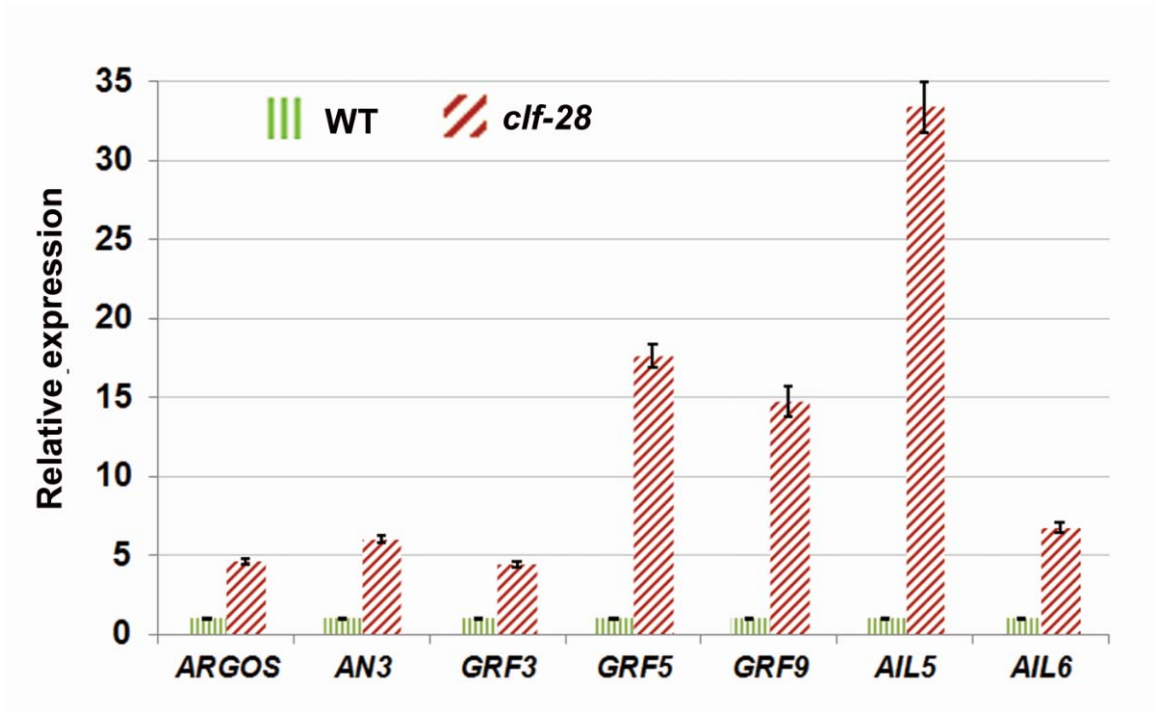

2

3 Supplemental Figure 12. Experimental verification of CRGs controlling cell size by  
4 qRT-PCR

5 Expression levels of genes regulating cell size in *clf-28* and WT siliques detected by  
6 qRT-PCR are given. Error bar represents standard error (n=3).

7

8
