# Supplementary material
Source: PubMed Central journal article supplement (PMC4854673)
Supplement: supp_pp.15.01335_PP2015-01335R2_Supplemental_Figure_S14.pdf [file supp_pp.15.01335_PP2015-01335R2_Supplemental_Figure_S14.pdf]

1 Supplemental Figure 14

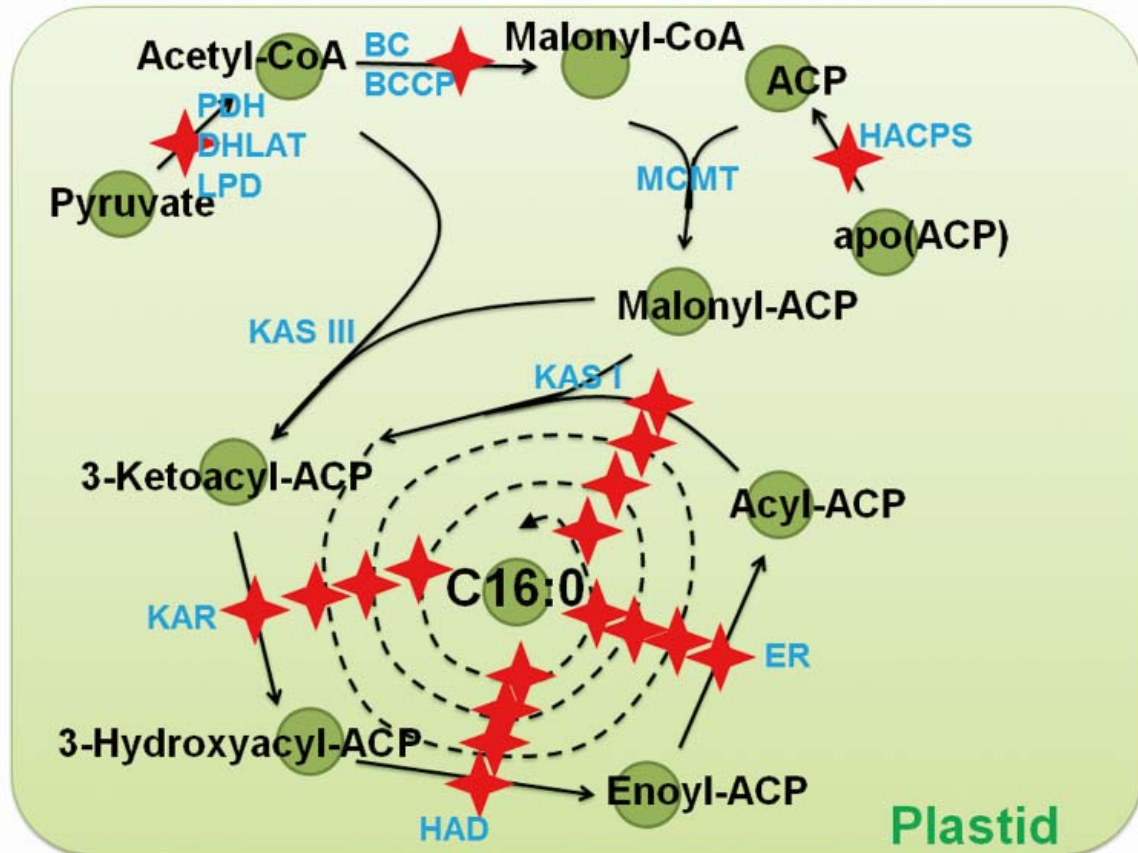

### Fatty acid synthesis

2

3 Supplemental Figure 14. CLF regulates several reactions in fatty acid synthesis  
4 pathway

5 A cartoon showing CLF regulates the 7 reactions (red stars) in fatty acid biosynthesis  
6 pathway.

7

8
